# Supplementary material for: The sponge microbiome project
Source: PubMed Central journal article supplement (PMC5632291; doi:10.1093/gigascience/gix077), 2017-08-16
Supplement: gix077_giga-d-17-00079_revision-1.pdf [file gix077_giga-d-17-00079_revision-1.pdf]

# The sponge microbiome project

Lucas Moitinho-Silva<sup>1</sup>, Shaun Nielsen<sup>1</sup>, Amnon Amir<sup>2</sup>, Antonio Gonzalez<sup>2</sup>, Gail L. Ackermann<sup>2</sup>, Carlo Cerrano<sup>3</sup>, Carmen Astudillo-Garcia<sup>4</sup>, Cole Easson<sup>5</sup>, Detmer Sipkema<sup>6</sup>, Fang Liu<sup>7</sup>, Georg Steinert<sup>6</sup>, Giorgos Kotoulas<sup>7</sup>, Grace P. McCormack<sup>8</sup>, Guofang Feng<sup>9</sup>, James J. Bell<sup>10</sup>, Jan Vicente<sup>11</sup>, Johannes R Björk<sup>12</sup>, Jose M. Montoya<sup>13</sup>, Julie B. Olson<sup>14</sup>, Julie Reveillaud<sup>15</sup>, Laura Steindler<sup>16</sup>, Mari-Carmen Pineda<sup>17</sup>, Maria V. Marra<sup>9</sup>, Micha Ilan<sup>18</sup>, Michael W. Taylor<sup>3</sup>, Paraskevi Polymenakou<sup>8</sup>, Patrick M. Erwin<sup>19</sup>, Peter J. Schupp<sup>20</sup>, Rachel L. Simister<sup>21</sup>, Rob Knight<sup>2,22</sup>, Robert W. Thacker<sup>23</sup>, Rodrigo Costa<sup>24</sup>, Russell T. Hill<sup>25</sup>, Susanna Lopez-Legentil<sup>19</sup>, Thanos Dailianis<sup>8</sup>, Timothy Ravasi<sup>26</sup>, Ute Hentschel<sup>27</sup>, Zhiyong Li<sup>6</sup>, Nicole S. Webster<sup>17,28</sup> and Torsten Thomas<sup>1,\*</sup>

<sup>1</sup>Centre for Marine Bio-Innovation and School of Biological, Earth and Environmental Sciences, The University of New South Wales, Sydney, 2052, Australia

<sup>2</sup>Department of Pediatrics, University of California - San Diego, La Jolla, CA 92093, USA

<sup>3</sup>Department of Life and Environmental Sciences, Polytechnic University of Marche, Ancona, 60131, Italy

<sup>4</sup>School of Biological Sciences, University of Auckland, Auckland, New Zealand

<sup>5</sup>Halmos College of Natural Sciences and Oceanography, Nova Southeastern University, Dania Beach, FL 33004, USA

<sup>6</sup>Wageningen University, Laboratory of Microbiology, Stippeneng 4, 6708 WE Wageningen, The Netherlands

<sup>7</sup>Hellenic Centre for Marine Research, Institute of Marine Biology, Biotechnology and Aquaculture, Thalassocosmos 71500 Heraklion Greece

<sup>8</sup>Zoology, School of Natural Sciences, Ryan Institute, National University of Ireland Galway, University Rd., Galway, Ireland

<sup>9</sup>State Key Laboratory of Microbial Metabolism and School of Life Sciences and Biotechnology, Shanghai Jiao Tong University, Shanghai 200240, P.R. China

<sup>10</sup>School of Biological Sciences, Victoria University of Wellington, Wellington, New Zealand

<sup>11</sup>Hawaii Institute of Marine Biology, 46-007 Lilipuna Road, Kaneohe, HI 96744-1346

<sup>12</sup>Galvin Life Science Center, University of Notre Dame, Notre Dame, IN 46556, USA and Ecological Networks and Global Change Group, Theoretical and Experimental Ecology Station, CNRS, Moulis, France

- 1  
2  
3  
4  
5  
6  
7  
8  
9  
10  
11  
12  
13  
14  
15  
16  
17  
18  
19  
20  
21  
22  
23  
24  
25  
26  
27  
28  
29  
30  
31  
32  
33  
34  
35  
36  
37  
38  
39  
40  
41  
42  
43  
44  
45  
46  
47  
48  
49  
50  
51  
52  
53  
54  
55  
56  
57  
58  
59  
60  
61  
62  
63  
64  
65
- 34 <sup>13</sup>Ecological Networks and Global Change Group, Theoretical and Experimental Ecology  
Station, CNRS and Paul Sabatier University, Moulis, France
- 35
- 36 <sup>14</sup>Department of Biological Sciences, University of Alabama, Tuscaloosa, AL 35487, USA
- 37 <sup>15</sup>INRA, UMR1309 CMAEE; Cirad, UMR15 CMAEE, 34398 Montpellier, France
- 38 <sup>16</sup>Department of Marine Biology, Leon H. Charney School of Marine Sciences, University of  
Haifa, Haifa, Israel
- 39
- 40 <sup>17</sup>Australian Institute of Marine Science (AIMS), Townsville, 4810, Queensland, Australia
- 41 <sup>18</sup>Department of Zoology, George S. Wise Faculty of Life Sciences, Tel Aviv University, Tel  
Aviv 69978, Israel
- 42
- 43 <sup>19</sup>Department of Biology and Marine Biology, University of North Carolina Wilmington,  
Wilmington NC 28409, USA
- 44
- 45 <sup>20</sup>Institute for Chemistry and Biology of the Marine Environment (ICBM), Carl-von-Ossietzky  
and University Oldenburg, Schleusenstr. 1, 26382 Wilhelmshaven, Germany
- 46
- 47 <sup>21</sup>Department of microbiology and immunology, University of British Columbia, Canada, V6T  
1Z3
- 48
- 49 <sup>22</sup>Department of Computer Science and Engineering, and Center for Microbiome Innovation,  
University of California - San Diego, La Jolla, CA 92093, USA
- 50
- 51 <sup>23</sup>Department of Ecology and Evolution, Stony Brook University, Stony Brook NY 11794, USA
- 52 <sup>24</sup>Institute for Bioengineering and Biosciences (IBB), Department of Bioengineering, IST,  
Universidade de Lisboa, Lisbon, Portugal
- 53
- 54 <sup>25</sup>Institute of Marine and Environmental Technology, University of Maryland Center for  
Environmental Science, 701 East Pratt Stree, Baltimore, MD 21202, USA
- 55
- 56 <sup>26</sup>KAUST Environmental Epigenetic Program (KEEP), Division of Biological and Environmental  
Sciences & Engineering, King Abdullah University of Science and Technology, Thuwal,  
Kingdom of Saudi Arabia
- 57
- 58 <sup>27</sup>RD3 Marine Microbiology, GEOMAR Helmholtz Centre for Ocean Research, Kiel, and  
Christian-Albrechts-University of Kiel, Germany
- 59
- 60 <sup>28</sup>Australian Centre for Ecogenomics, School of Chemistry and Molecular Biosciences,  
University of Queensland, St Lucia, QLD, Australia
- 61
- 62
- 63
- 64
- 65

\*Corresponding author: [t.thomas@unsw.edu.au](mailto:t.thomas@unsw.edu.au); Centre for Marine Bio-Innovation,  
UNSW, Sydney, Australia

68           **Abstract**

69           **Background:** Marine sponges (phylum Porifera) are a diverse, phylogenetically deep-  
70 branching clade known for forming intimate partnerships with complex communities of  
71 microorganisms. To date, 16S rRNA gene sequencing studies have largely utilised different extraction  
72 and amplification methodologies to target the microbial communities of a limited number of sponge  
73 species, severely limiting comparative analyses of sponge microbial diversity and structure. Here, we  
74 provide an extensive and standardised dataset that will facilitate sponge microbiome comparisons  
75 across large spatial, temporal and environmental scales.

76           **Findings:** Samples from marine sponges (n=3569 specimens), seawater (n=370), marine  
77 sediments (n=65) and other environments (n=29) were collected from different locations across the  
78 globe. This dataset incorporates at least 269 different sponge species, including several yet  
79 unidentified taxa. The V4 region of the 16S rRNA gene was amplified and sequenced from extracted  
80 DNA using standardised procedures. Raw sequences (total of 1.1 billion sequences) were processed  
81 and clustered with a) a standard protocol using QIIME closed-reference picking resulting in 39,543  
82 Operational Taxonomic Units (OTU) at 97% sequence identity, b) a *de novo* protocol using Mothur  
83 resulting in 518,246 OTUs, and c) a new high-resolution Deblur protocol resulting in 83,908 unique  
84 bacterial sequences. Abundance tables, representative sequences, taxonomic classifications and  
85 metadata are provided.

86           **Conclusions:** This dataset represents a comprehensive resource of sponge-associated  
87 microbial communities based on 16S rRNA gene sequences that can be used to address overarching  
88 hypotheses regarding host-associated prokaryotes, including host-specificity, convergent evolution,  
89 environmental drivers of microbiome structure and the sponge-associated rare biosphere.

90

91           **Keywords:** Marine sponges, Archaea, Bacteria, Symbiosis, Microbiome, 16S rRNA gene,  
92 Microbial diversity

93

## 94 Data Description

### 95 *Purpose of data acquisition*

96 Sponges (phylum Porifera) are an ancient metazoan clade [1], with more than 8,500 formally  
97 described species [2]. Sponges are benthic organisms that have important ecological functions in  
98 aquatic habitats [3, 4]. Marine sponges are often found in symbiotic association with  
99 microorganisms and these microbial communities can be very diverse and complex [5, 6]. Sponge  
100 symbionts perform a wide range of functional roles, including vitamin synthesis, production of  
101 bioactive compounds and biochemical transformations of nutrients or waste products [7-9]. The  
102 diversity of microorganisms associated with sponges has been the subject of intense study (the  
103 search of “sponge microbial diversity” returned 348 publications in Scopus database [10]. Most of  
104 these studies were performed on individual species from restricted geographic regions [e.g., 11, 12].  
105 A comparative assessment of these studies is often hindered by differences in sample processing  
106 and 16S rRNA gene sequencing. However, two recent studies incorporating a large number of  
107 sponge microbiomes (> 30) [5, 13] revealed the potential of large-scale, standardised, high-  
108 throughput sequencing for gaining insights into the diversity and structure of sponge-associated  
109 microbial communities. The purpose of this global dataset is to provide a comprehensive 16S rRNA  
110 gene-based resource for investigating and comparing microbiomes more generally across the  
111 phylum Porifera.

### 112 *Sample collection, processing and 16S rRNA gene sequencing*

113 Sample collection and processing, species identification and DNA extractions were  
114 conducted as previously described [13]. A total of 3569 sponge specimens were collected,  
115 representing at least 268 species, including several yet unidentified taxa (hereafter collectively  
116 referred to as species) (Supplementary Table S1). Of the total species, 213 were represented by at  
117 least three specimens. *Carteriospongia foliascens* had the highest replication comprising 150  
118 individuals. Seawater (n=370), sediment (n=65), algae (n=1) and echinoderm (n=1) samples as well as  
119 biofilm swabs (n=21) of rock surfaces were collected in close proximity to the sponges for  
120 comparative community analysis. Six negative control samples (sterile water) were processed to  
121 identify any potential contaminations. Of the samples included in this current dataset, 973 samples  
122 had been analysed previously [13]. Samples were collected from a wide range of geographical  
123 locations (Figure 1 and Supplementary Table S1). Total DNA was extracted as previously described  
124 [13] and used as templates to amplify and sequence the V4 region of the 16S rRNA gene using the  
125 standard procedures of the EMP [14, 15].

126 *Processing of sequencing data*

127 Clustering using the EMP standard protocols in QIIME:

128 Raw sequences were demultiplexed and quality controlled following the recommendations of [16].  
129 Quality-filtered, demultiplexed fastq files were processed using the default closed-reference pipeline  
130 from QIIME v. 1.9.1 (QIIME, RRID:SCR\_008249). Briefly, sequences were matched against  
131 GreenGenes reference database (v. 13\_8 clustered at 97% similarity). Sequences that failed to align  
132 (e.g. chimeras) were discarded, which resulted in a final number of 300,140,110 sequences. Taxonomy  
133 assignments and the phylogenetic tree information were taken from the centroids of the reference  
134 sequence clusters contained in the GreenGenes reference database (Greengenes,  
135 RRID:SCR\_002830). This closed-reference analysis allows for cross-dataset comparisons and direct  
136 comparison with the tens of thousands of other samples processed in the EMP and available via the  
137 Qiita database [17].

138 Clustering using Mothur:

139 Quality-filtered, demultiplexed fastq files were also processed using Mothur v. 1.37.6  
140 (mothur, RRID:SCR\_011947) [18] and Python v. 2.7 (Python Programming Language,  
141 RRID:SCR\_008394) [19] custom scripts with modifications from previously established protocols [13].  
142 Detailed descriptions and command outputs are available at the project notebook (see Availability of  
143 supporting data). Briefly, sequences were quality-trimmed to a maximum length of 100 bp. To  
144 minimize computational effort, the dataset was reduced to unique sequences, retaining total  
145 sequence counts. Sequences were aligned to the V4 region of the 16S rRNA gene sequences from  
146 the SILVA v. 123 database (SILVA, RRID: SCR\_006423) [20]. Sequences that aligned at the expected  
147 positions were kept and this dataset was again reduced to unique sequences. Further, singletons  
148 were removed from the dataset and remaining sequences were pre-clustered if they differed by one  
149 nucleotide position. Sequences classified as eukaryote, chloroplast, mitochondria or unknown  
150 according to the Greengenes (v. 13\_8 clustered at 99% similarity) [21] and SILVA taxonomies [22]  
151 were removed. Chimeras were identified with UCHIME (UCHIME, RRID: SCR\_008057) [23] and  
152 removed. Finally, sequences were *de novo* clustered into Operational Taxonomic Units (OTUs) using  
153 the furthest neighbour method at 97% similarity. Representative sequences of OTUs were retrieved  
154 based on the mean distance among the clustered sequences. Consensus taxonomies based on the  
155 SILVA, Greengenes and RDP (v. 14\_032015; Ribosomal Database Project, RRID: SCR\_006633) [24]  
156 databases were obtained based on the classification of sequences clustered within each OTU. The  
157 inclusion of these taxonomies is helpful considering that they have substantial differences as  
158 recently discussed [25]. For example, Greengenes and RDP have the taxon Poribacteria, a prominent  
159 sponge-enriched phylum [26], which did not exist in the SILVA version used.

160 De-noising using Deblur:

1  
2 161 Recently, sub-OTU methods that allow views of the data at single-nucleotide resolution have  
3  
4 162 become available. One such method is Deblur [27], which is a denoising algorithm for identification  
5  
6 163 of actual bacterial sequences present in a sample. Using an upper bound on the PCR and read-error  
7  
8 164 rates, Deblur processes each sample independently and outputs the list of sequences and their  
9  
10 165 frequencies in each sample, enabling single nucleotide resolution. For creating the deblurred biom  
11  
12 166 table, quality filtered, demultiplexed fasta files were used as input to Deblur using a trim length of  
13  
14 167 100, and min-reads of 25 (removing sOTUs with < 25 reads total in all samples combined). Taxonomy  
15  
16 168 was added to resulting biom table using QIIME [28], RDP classifier [29] and Greengenes v. 13.8 [21].  
16

17 169  
18  
19  
20 170 Database metadata category enrichment:

21  
22 171 For enrichment analysis of metadata terms in a set of sequences, each unique metadata  
23  
24 172 value is tested using both a binomial test and a ranksum test. All analysis is performed on a  
25  
26 173 randomly subsampled (to 5000 reads/sample) table.  
27

28 174 The binomial (presence/absence) p-value for enrichment calculated as follows:  
29

30  
31 175 For a bacterial sequence  $s$  and metadata value  $v$ , denote  $N$  the total number of samples,  $O(s)$   
32  
33 176 the number of samples where  $s$  is present,  $K_v(s)$  the number of sample with value  $v$  where  $s$  is  
34  
35 177 present, and  $T(v)$  the total number of samples with value  $v$ .

36  
37 178 
$$\text{p-value} = \text{binomial\_cdf} ( T(v)-K_v(s), T(v), P_{\text{Null}}(s) )$$
  
38

39 179 where  $P_{\text{Null}}(s) = O(s) / N$   
40

41  
42 180 The ranksum (frequency aware) p-value is calculated using the Kruskal-Wallis test (implemented in  
43  
44 181 `scipy 0.19`) as follows:

45  
46 182 For a bacterial sequence  $s$  and metadata value  $v$ , denote by  $F_v(s)$  the vector of relative  
47  
48 183 frequencies of bacteria  $s$  in all samples with metadata value  $v$ , and denote by  $\widehat{F}_v(s)$  the vector of  
49  
50 184 relative frequencies of bacteria  $s$  in all samples with metadata other than  $v$ . The ranksum p-value is  
51  
52 185 then calculated using the Kruskal-Wallis test for  $F_v(s)$  and  $\widehat{F}_v(s)$ , and shown only if significantly  
53  
54 186 enriched in samples containing  $v$  (i.e. rank difference of  $F_v(s) - \widehat{F}_v(s) > 0$ ).  
55

56 187 We have set up a webserver ([www.spongeemp.com](http://www.spongeemp.com)) that performs this enrichment analysis for  
57  
58 188 user-defined sequence submissions. The code for the webserver is also available in Github [29] for a  
59  
60 189 local installation.  
61

190 **Data description**

1  
2  
3 191 The dataset covers 4033 samples with a total of 1,167,226,701 raw sequence reads. These  
4  
5 192 sequence reads clustered into 39,543 OTUs using QIIME's closed-reference processing, 518,246  
6  
7 193 OTUs from *de novo* clustering using Mothur (not filtered for OTU abundances), and 83,908 sOTUs  
8  
9 194 using Deblur (with a filtering of at least 25 reads total per sOTU). We recommend that data users  
10  
11 195 consider the differences in sequencing depths per sample and abundance filtering for certain  
12  
13 196 downstream analyses, such as when calculating diversity estimates [16] and comparing OTU  
14  
15 197 abundances across samples [31]. In terms of taxonomic diversity, most Mothur OTUs were assigned  
16  
17 198 to the phylum Proteobacteria, although more than 60 different microbial phyla were recovered from  
18  
19 199 the marine sponge samples according to SILVA (n=63) and Greengenes classifications (n=72) (Figure  
20  
21 200 2).

21 201

24 202 **Potential uses**

25  
26  
27 203 This dataset can be utilised to assess a broad range of ecological questions pertaining to  
28  
29 204 host-associated microbial communities generally or to sponge microbiology specifically. These  
30  
31 205 include: i) the degree of host-specificity, ii) the existence of biogeographic or environmental  
32  
33 206 patterns, iii) the relation of microbiomes to host phylogeny, iv) the variability of microbiomes within  
34  
35 207 or between host species, v) symbiont co-occurrence patterns as well as vi) assessing the existence of  
36  
37 208 a core sponge microbiome. An example of this type of analysis is shown in Figure 3, where samples  
38  
39 209 were clustered using unweighted UniFrac data [10] with a Principal Coordinate Analysis and  
40  
41 210 visualization in Emperor [15] based on their origins from sponges, seawater or kelps [17].  
42  
43  
44  
45  
46  
47  
48

47 211

49 212 **Availability and requirements**

52 213 Project name: The Sponge Microbiome Project

55 214 Project home page: [www.spongeemp.com](http://www.spongeemp.com); <https://github.com/amnona/SpongeEMP>

57 215 Operating system(s): Unix

60 216 Programming language: Python and R

217 Other requirements: Python v. 2.7, Biopython v. 1.65, Python 3.5, R v. 3.2.2, Mothur v.  
1 218 1.37.6, QIIME v. 1.9.1, Deblur

4 219 License: MIT

7 220 Any restrictions to use by non-academics: None

9 221

## 12 222 Availability of supporting data

15 223 Raw sequence data were deposited in the European Nucleotide Archive (accession numbers:  
16 224 ERP020690). Quality-filtered, demultiplexed fastq files, Deblur and QIIME resulting OTU tables are  
17 225 available at Qiita database [17] (Study ID: 10793). The additional datasets that support the results of  
18 226 this article are available in the GigaScience repository, GigaDB [32] and include an OTU abundance  
19 227 matrix (the output “.shared” file from Mothur, which is tab delimited), an OTU taxonomic  
20 228 classification table (tab delimited text file), an OTU representative sequence FASTA file, a table of  
21 229 samples’ metadata, the biom file of the QIIME analysis and the associated tree file. The project  
22 230 workflow, Mothur commands and additional scripts are available as HTML in GigaDB [32], which is  
23 231 viewed in any browser.

31 232 The deblurred dataset has also been uploaded to an online server [19] that supplies both  
32 233 html and REST-API access for querying bacterial sequences and obtaining the observed prevalence  
33 234 and enriched metadata categories where the sequence is observed (Figure 4). This allows an  
34 235 interactive view of which sequences are associated with which specific parameters, such as depth or  
35 236 salinity.

41 237

44 238

## 47 239 List of abbreviations

49 240 bp: base pairs

52 241 OTU: operational taxonomic unit

55 242 rRNA: ribosomal RNA

## 57 243 Competing interests

60 244 The authors declare that they have no competing interests.



245 **Funding**

1  
2  
3 246 T.T. and N.S.W were funded by an Australian Research Council Future Fellowship  
4 247 FT140100197 and FT120100480, respectively. T.T. received funds from the Gordon and Betty Moore  
5  
6 248 Foundation. This work was also supported in part by the W.M. Keck Foundation and the John  
7  
8 249 Templeton Foundation. R.K. received funding as a Howard Hughes Medical Institute Early Career  
9  
10 250 Scientist.

11  
12 251

13  
14  
15 252 **Authors' contributions**

16  
17  
18 253 L.M.-S., N.S.W. and T.T. designed the study. C.A.G., D.S., F.L., G.S., G.K., G.McC., G.-F. F, J.J.B.,  
19  
20 254 J.V., J.R.B., J.M.M., J.R., L.S., M.C.P, M.V.M., M.W.T., N.S.W., P.P., P.M.E., P.J.S., R.L.S, R.W.T., R.C.,  
21  
22 255 R.T.H., S.L-L., T.D., T.R., U.H. and Z-Y. L. collected samples. C.A.G., D.S., J.V., J.R.B., L.S., M.C.P.,  
23  
24 256 M.W.T., N.S.W., P.M.E., R.L.S, R.W.T., S.L-L. and U.H. extracted DNA. G.L.A. and R.K. sequenced DNA.  
25  
26 257 L.M.-S., S.N., A.A., A.G., G.L.A. and T.T. performed data processing and analysis. L.M.-S., N.S.W. and  
27  
28 258 T.T. wrote the manuscript. All authors contributed to the writing of the manuscript.

29  
30 259

31  
32  
33 260 **References**

34  
35  
36 261 1. Li CW, Chen JY and Hua TE. Precambrian sponges with cellular structures. *Science*. 1998;279  
37 262 5352:879-82.  
38 263 2. Van Soest RW, Boury-Esnault N, Vacelet J, Dohrmann M, Erpenbeck D, De Voogd NJ, et al.  
39 264 Global diversity of sponges (Porifera). *PLoS One*. 2012;7 4:e35105.  
40 265 doi:10.1371/journal.pone.0035105.  
41 266 3. Bell JJ. The functional roles of marine sponges. *Estuar Coast Shelf S*. 2008;79 3:341-53.  
42 267 4. de Goeij JM, van Oevelen D, Vermeij MJ, Osinga R, Middelburg JJ, de Goeij AF, et al. Surviving  
43 268 in a marine desert: the sponge loop retains resources within coral reefs. *Science*. 2013;342  
44 269 6154:108-10. doi:10.1126/science.1241981.  
45 270 5. Schmitt S, Tsai P, Bell J, Fromont J, Ilan M, Lindquist N, et al. Assessing the complex sponge  
46 271 microbiota: core, variable and species-specific bacterial communities in marine sponges. *ISME*  
47 272 *J*. 2012;6 3:564-76. doi:10.1038/ismej.2011.116.  
48 273 6. Webster NS, Taylor MW, Behnam F, Lucker S, Rattei T, Whalan S, et al. Deep sequencing  
49 274 reveals exceptional diversity and modes of transmission for bacterial sponge symbionts.  
50 275 *Environ Microbiol*. 2010;12 8:2070-82. doi:10.1111/j.1462-2920.2009.02065.x.  
51 276 7. Siegl A, Kamke J, Hochmuth T, Piel J, Richter M, Liang C, et al. Single-cell genomics reveals the  
52 277 lifestyle of Poribacteria, a candidate phylum symbiotically associated with marine sponges.  
53 278 *ISME J*. 2011;5 1:61-70. doi:10.1038/ismej.2010.95.  
54 279 8. Taylor MW, Radax R, Steger D and Wagner M. Sponge-associated microorganisms: evolution,  
55 280 ecology, and biotechnological potential. *Microbiol Mol Biol Rev*. 2007;71 2:295-347.  
56 281 doi:10.1128/MMBR.00040-06.

282 9. Wilson MC, Mori T, Ruckert C, Uria AR, Helf MJ, Takada K, et al. An environmental bacterial  
1 283 taxon with a large and distinct metabolic repertoire. *Nature*. 2014;506 7486:58-62.  
2 284 doi:10.1038/nature12959.

3 285 10. Lozupone C and Knight R. UniFrac: a new phylogenetic method for comparing microbial  
4 286 communities. *Appl Environ Microbiol*. 2005;71 12:8228-35. doi:10.1128/AEM.71.12.8228-  
5 287 8235.2005.

7 288 11. Moitinho-Silva L, Bayer K, Cannistraci CV, Giles EC, Ryu T, Seridi L, et al. Specificity and  
8 289 transcriptional activity of microbiota associated with low and high microbial abundance  
9 290 sponges from the Red Sea. *Mol Ecol*. 2014;23 6:1348-63. doi:10.1111/mec.12365.

10 291 12. Montalvo NF and Hill RT. Sponge-associated bacteria are strictly maintained in two closely  
11 292 related but geographically distant sponge hosts. *Appl Environ Microbiol*. 2011;77 20:7207-16.  
12 293 doi:10.1128/AEM.05285-11.

14 294 13. Thomas T, Moitinho-Silva L, Lurgi M, Bjork JR, Easson C, Astudillo-Garcia C, et al. Diversity,  
15 295 structure and convergent evolution of the global sponge microbiome. *Nat Commun*.  
16 296 2016;7:11870. doi:10.1038/ncomms11870.

17 297 14. Gilbert JA, Jansson JK and Knight R. The Earth Microbiome project: successes and aspirations.  
18 298 *BMC Biol*. 2014;12:69. doi:10.1186/s12915-014-0069-1.

20 299 15. Vazquez-Baeza Y, Pirrung M, Gonzalez A and Knight R. EMPeror: a tool for visualizing high-  
21 300 throughput microbial community data. *Gigascience*. 2013;2 1:16. doi:10.1186/2047-217X-2-  
22 301 16.

23 302 16. Bokulich NA, Subramanian S, Faith JJ, Gevers D, Gordon JL, Knight R, et al. Quality-filtering  
24 303 vastly improves diversity estimates from Illumina amplicon sequencing. *Nat Methods*.  
25 304 2013;10 1:57-9. doi:10.1038/nmeth.2276.

27 305 17. Marzinski EM, Campbell AH, Zozaya Valdes E, Verges A, Nielsen S, Wernberg T, et al.  
28 306 Continental-scale variation in seaweed host-associated bacterial communities is a function of  
29 307 host condition, not geography. *Environ Microbiol*. 2015;17 10:4078-88. doi:10.1111/1462-  
30 308 2920.12972.

32 309 18. Schloss PD, Westcott SL, Ryabin T, Hall JR, Hartmann M, Hollister EB, et al. Introducing  
33 310 mothur: open-source, platform-independent, community-supported software for describing  
34 311 and comparing microbial communities. *Appl Environ Microbiol*. 2009;75 23:7537-41.  
35 312 doi:10.1128/AEM.01541-09.

36 313 19. Sponge microbiome project deblurred dataset online server. <http://www.spongeemp.com>.  
37 314 Accessed 31 Mar 2017.

39 315 20. Quast C, Pruesse E, Yilmaz P, Gerken J, Schweer T, Yarza P, et al. The SILVA ribosomal RNA  
40 316 gene database project: improved data processing and web-based tools. *Nucleic Acids Res*.  
41 317 2013;41 Database issue:D590-6. doi:10.1093/nar/gks1219.

42 318 21. DeSantis TZ, Hugenholtz P, Larsen N, Rojas M, Brodie EL, Keller K, et al. Greengenes, a  
43 319 chimera-checked 16S rRNA gene database and workbench compatible with ARB. *Appl Environ*  
44 320 *Microbiol*. 2006;72 7:5069-72. doi:10.1128/AEM.03006-05.

46 321 22. Yilmaz P, Parfrey LW, Yarza P, Gerken J, Pruesse E, Quast C, et al. The SILVA and "All-species  
47 322 Living Tree Project (LTP)" taxonomic frameworks. *Nucleic Acids Res*. 2014;42 Database  
48 323 issue:D643-8. doi:10.1093/nar/gkt1209.

49 324 23. Edgar RC, Haas BJ, Clemente JC, Quince C and Knight R. UCHIME improves sensitivity and  
50 325 speed of chimera detection. *Bioinformatics*. 2011;27 16:2194-200.  
51 326 doi:10.1093/bioinformatics/btr381.

53 327 24. Cole JR, Wang Q, Fish JA, Chai B, McGarrell DM, Sun Y, et al. Ribosomal Database Project: data  
54 328 and tools for high throughput rRNA analysis. *Nucleic Acids Res*. 2014;42 Database issue:D633-  
55 329 42. doi:10.1093/nar/gkt1244.

57 330 25. Balvociute M and Huson DH. SILVA, RDP, Greengenes, NCBI and OTT - how do these  
58 331 taxonomies compare? *BMC Genomics*. 2017;18 Suppl 2:114. doi:10.1186/s12864-017-3501-  
59 332 4.

333 26. Fieseler L, Horn M, Wagner M and Hentschel U. Discovery of the novel candidate phylum  
 1 334 "Poribacteria" in marine sponges. *Appl Environ Microbiol.* 2004;70 6:3724-32.  
 2 335 doi:10.1128/AEM.70.6.3724-3732.2004.  
 3 336 27. Amir A, McDonald D, Navas-Molina JA, Kopylova E, Morton JT, Zech Xu Z, et al. Deblur rapidly  
 4 337 resolves single-nucleotide community sequence patterns. *mSystems.* 2017;2 2  
 5 338 doi:10.1128/mSystems.00191-16.  
 6 339 28. Caporaso JG, Kuczynski J, Stombaugh J, Bittinger K, Bushman FD, Costello EK, et al. QIIME  
 7 340 allows analysis of high-throughput community sequencing data. *Nat Methods.* 2010;7 5:335-  
 8 341 6. doi:10.1038/nmeth.f.303.  
 9 342 29. Wang Q, Garrity GM, Tiedje JM and Cole JR. Naive Bayesian classifier for rapid assignment of  
 10 343 rRNA sequences into the new bacterial taxonomy. *Appl Environ Microbiol.* 2007;73 16:5261-  
 11 344 7. doi:10.1128/AEM.00062-07.  
 12 345 30. SpongeEMP GitHub. <https://github.com/amnona/SpongeEMP>. Accessed 31 Mar 2017.  
 13 346 31. McMurdie PJ and Holmes S. Waste not, want not: why rarefying microbiome data is  
 14 347 inadmissible. *PLoS Comput Biol.* 2014;10 4:e1003531. doi:10.1371/journal.pcbi.1003531.32.  
 15 348 32. Moitinho-Silva L, Nielsen S, Amir A, Gonzalez A, Ackermann GL, Cerrano C et al. Supporting  
 16 349 data for "The sponge microbiome project" GigaScience Database. 2017.  
 17 350 <http://dx.doi.org/10.5524/100332>

21 351  
 22 352

25 353

27 354 **Figures**

30 355

33 356 **Figure 1.**

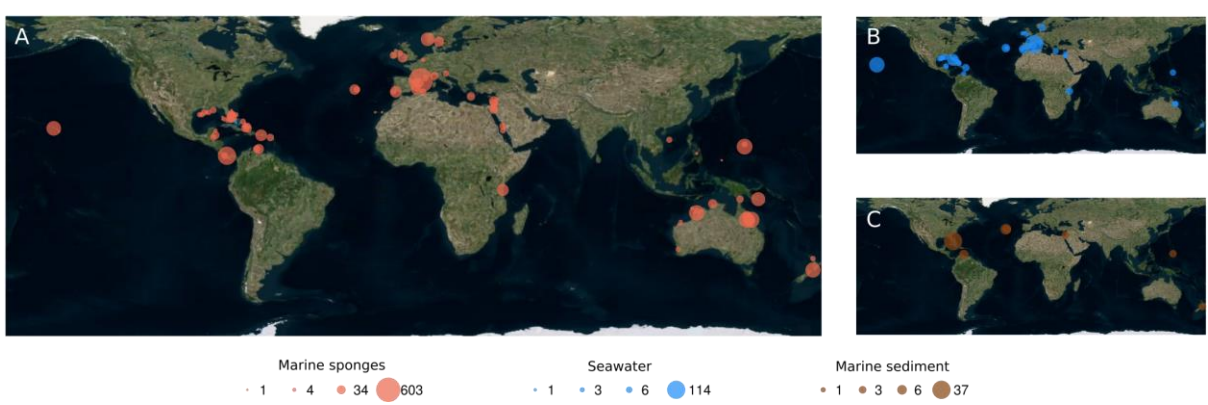

47 357

49 358

52 359 **Figure 2.**

53  
 54  
 55  
 56  
 57  
 58  
 59  
 60  
 61  
 62  
 63  
 64  
 65

1  
2  
3  
4  
5  
6  
7  
8  
9  
10  
11  
12  
13  
14  
15  
16  
17  
18  
19  
20  
21  
22  
23  
24  
25  
26  
27  
28  
29  
30  
31  
32  
33  
34  
35  
36  
37  
38  
39  
40  
41  
42  
43  
44  
45  
46  
47  
48  
49  
50  
51  
52  
53  
54  
55  
56  
57  
58  
59  
60  
61  
62  
63  
64  
65

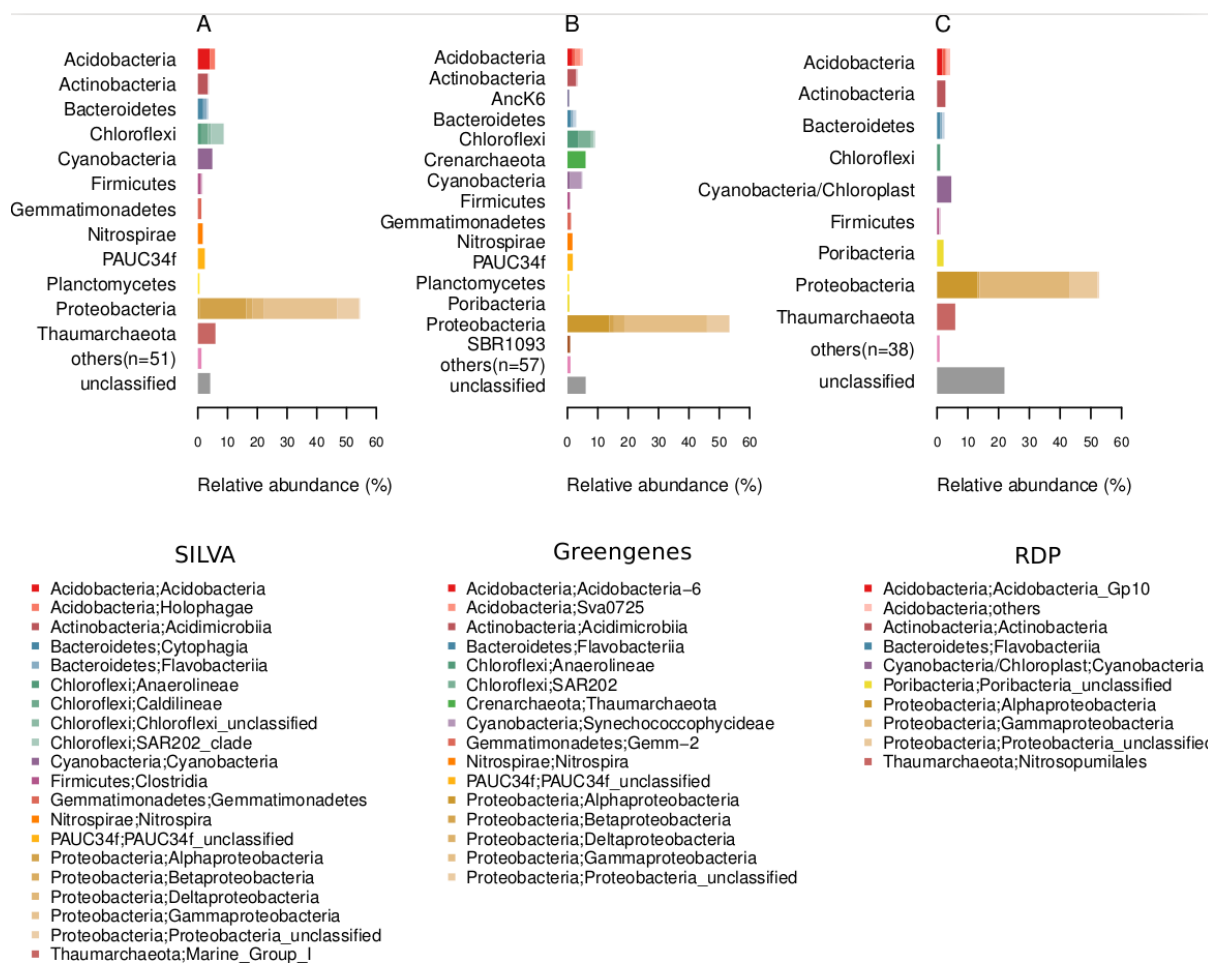

361 Figure 3.

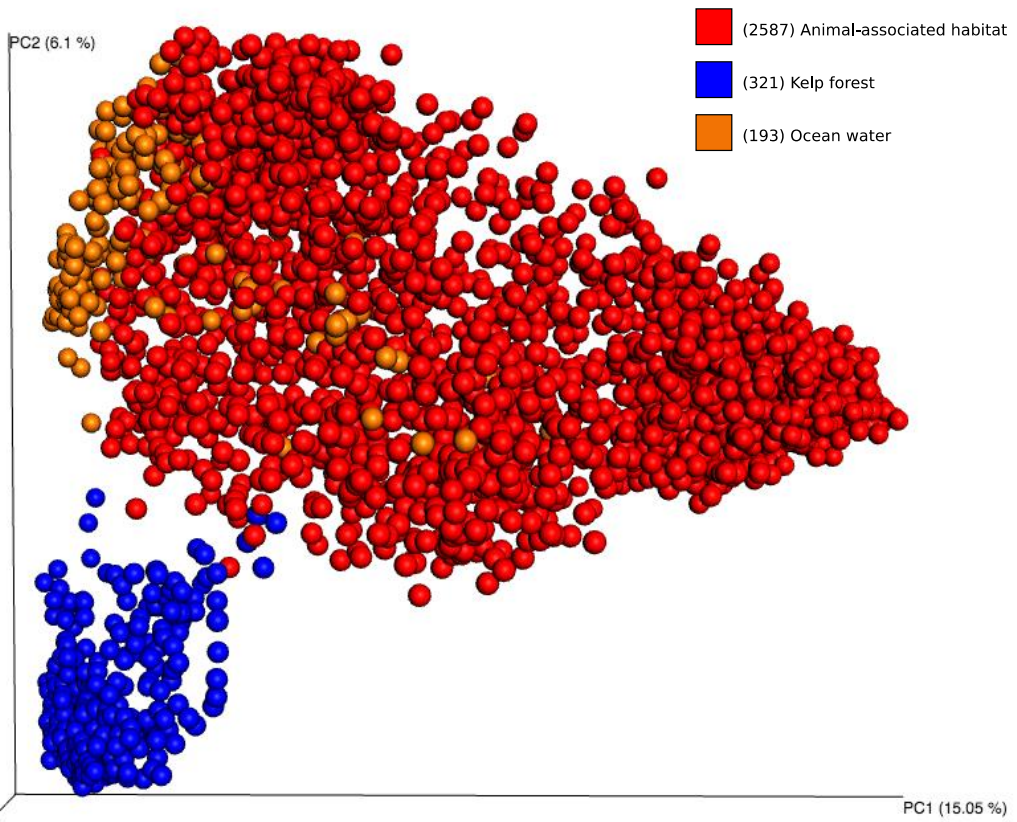

362

363

364 Figure 4.

taxonomy: k\_Bacteria;p\_Proteobacteria;c\_Alphaproteobacteria;o\_Rhizobiales

sequence: TACGAAGGGGCTAGCGTTGTTCCGAATCACTGGGCGTAAAGCGCACGTAGCGGACTTTTAAGTCAGGGGTGAAATCCCGGGGCTCAACCCCGGAACTG  
More info from dbBact  
Present in 0.034474 of samples (132 / 3829)

▼ host\_scientific\_name (6 significant)

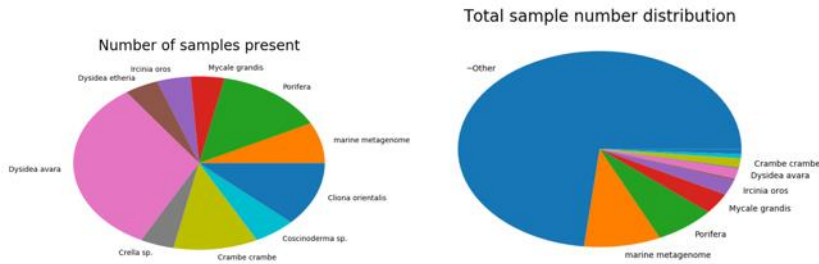

**Significant enrichment:**  
 host\_scientific\_name:Dysidea avara (30/64) (p=0.000000)  
 host\_scientific\_name:Cella sp. (4/9) (p=0.000155)  
 host\_scientific\_name:Dysidea etheria (4/10) (p=0.000251)  
 host\_scientific\_name:Cliona orientalis (11/31) (p=0.000000)  
 host\_scientific\_name:Coccinoderma sp. (5/27) (p=0.002082)  
 host\_scientific\_name:Crambe crambe (10/56) (p=0.000020)

► env\_feature (1 significant)  
 ► country (3 significant)  
 ► ALL (84 significant)

[View as table](#)

365

### Legends

366

Figure 1. Global sample collection sites. Bubbles indicate collection sites of (A) marine sponges, (B) seawater and (C) marine sediment samples. Bubble sizes are proportional to number of samples as indicated.

367

368

369

Figure 2. Microbial taxonomic profile of marine sponge samples processed with Mothur. (A) SILVA, (B) Greengenes and (C) RDP taxonomies are shown. OTU sequence counts were grouped according to phylum and class. Taxa with relative abundances ≤ 0.5% were grouped as ‘others’. Classes with relative abundances > 1% are shown in the legend (phylum “;” class). Relative abundances are represented on the x-axes.

370

371

372

373

374

Figure 3. Unweighted UniFrac Principal Coordinates Analysis (PCA) of samples from sponges (“animal-associated habitat”), kelp forest and ocean water. A separation can be seen between samples based to the environmental origin. Samples were rarefying to 10,000 sequences per sample. A movie showing the PCA plot in 3 D is provided in the supporting information.

375

376

377

378

379

Figure 4. Output of the enrichment analysis through the online server www.spongeemp.com. Top line shows taxonomic assignment for the user-submitted sequence in

380

381

382

383

384

382 the second line. Pie charts below show the total number of samples (right) and the number of  
383 samples where the submitted sequence is present (left) based on the scientific names of the host,  
384 followed by the significantly enriched host names containing the submitted sequence (using either  
385 presence/absence binomial test or relative-frequency based ranksum test). At the bottom, fields  
386 can be opened to show results of the enrichment analyses for other metadata types (e.g. country).

387

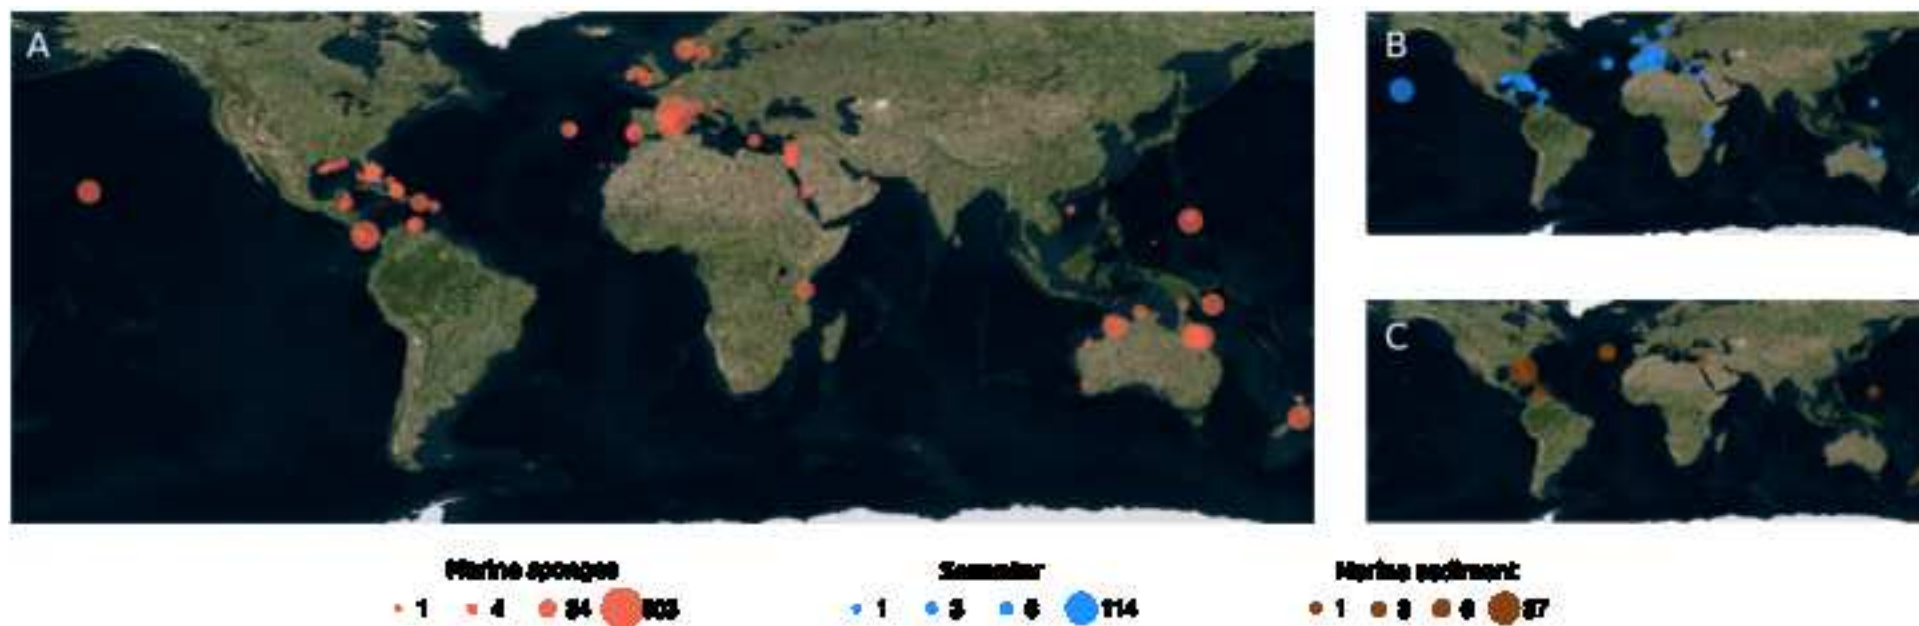



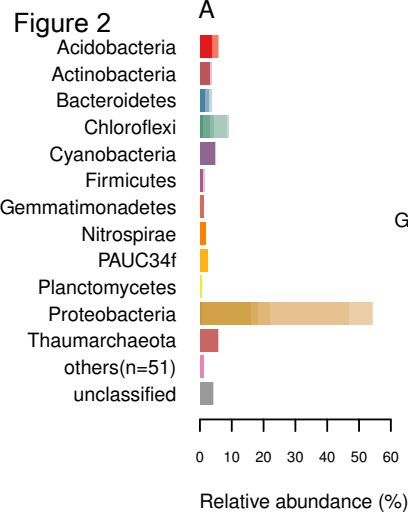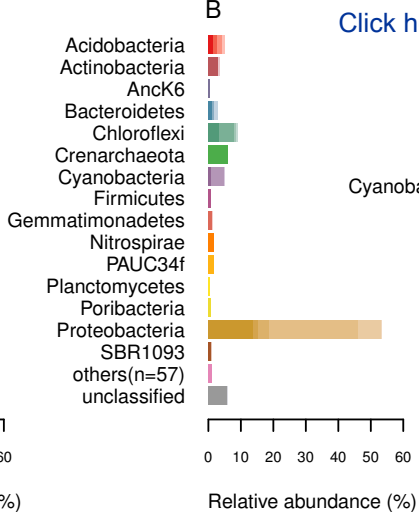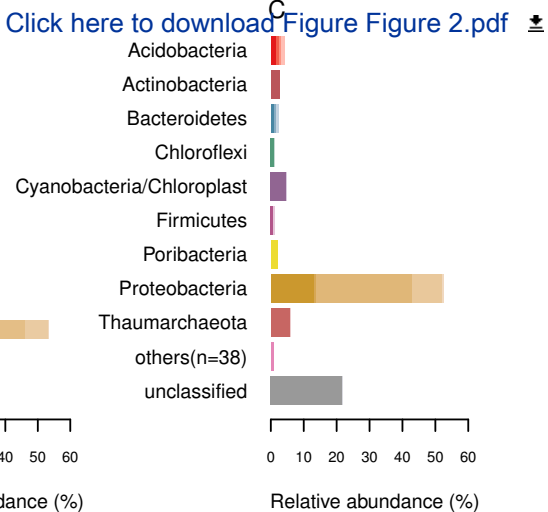

[Click here to download Figure Figure 2.pdf](#)

### SILVA

- Acidobacteria;Acidobacteria
- Acidobacteria;Holophagae
- Actinobacteria;Acidimicrobiia
- Bacteroidetes;Cytophagia
- Bacteroidetes;Flavobacteriia
- Chloroflexi;Anaerolineae
- Chloroflexi;Caldilineae
- Chloroflexi;Chloroflexi\_unclassified
- Chloroflexi;SAR202\_clade
- Cyanobacteria;Cyanobacteria
- Firmicutes;Clostridia
- Gemmatimonadetes;Gemmatimonadetes
- Nitrospirae;Nitrospira
- PAUC34f;PAUC34f\_unclassified
- Proteobacteria;Alphaproteobacteria
- Proteobacteria;Betaproteobacteria
- Proteobacteria;Deltaproteobacteria
- Proteobacteria;Gammaproteobacteria
- Proteobacteria;Proteobacteria\_unclassified
- Thaumarchaeota;Marine\_Group\_I

### Greengenes

- Acidobacteria;Acidobacteria-6
- Acidobacteria;Sva0725
- Actinobacteria;Acidimicrobiia
- Bacteroidetes;Flavobacteriia
- Chloroflexi;Anaerolineae
- Chloroflexi;SAR202
- Crenarchaeota;Thaumarchaeota
- Cyanobacteria;Synechococophycideae
- Gemmatimonadetes;Gemm-2
- Nitrospirae;Nitrospira
- PAUC34f;PAUC34f\_unclassified
- Proteobacteria;Alphaproteobacteria
- Proteobacteria;Betaproteobacteria
- Proteobacteria;Deltaproteobacteria
- Proteobacteria;Gammaproteobacteria
- Proteobacteria;Proteobacteria\_unclassified

### RDP

- Acidobacteria;Acidobacteria\_Gp10
- Acidobacteria;others
- Actinobacteria;Actinobacteria
- Bacteroidetes;Flavobacteriia
- Cyanobacteria;Chloroplast;Cyanobacteria
- Poribacteria;Poribacteria\_unclassified
- Proteobacteria;Alphaproteobacteria
- Proteobacteria;Gammaproteobacteria
- Proteobacteria;Proteobacteria\_unclassified
- Thaumarchaeota;Nitrosopumilales

Figure 3

[Click here to download Figure Figure.3.pdf](#)

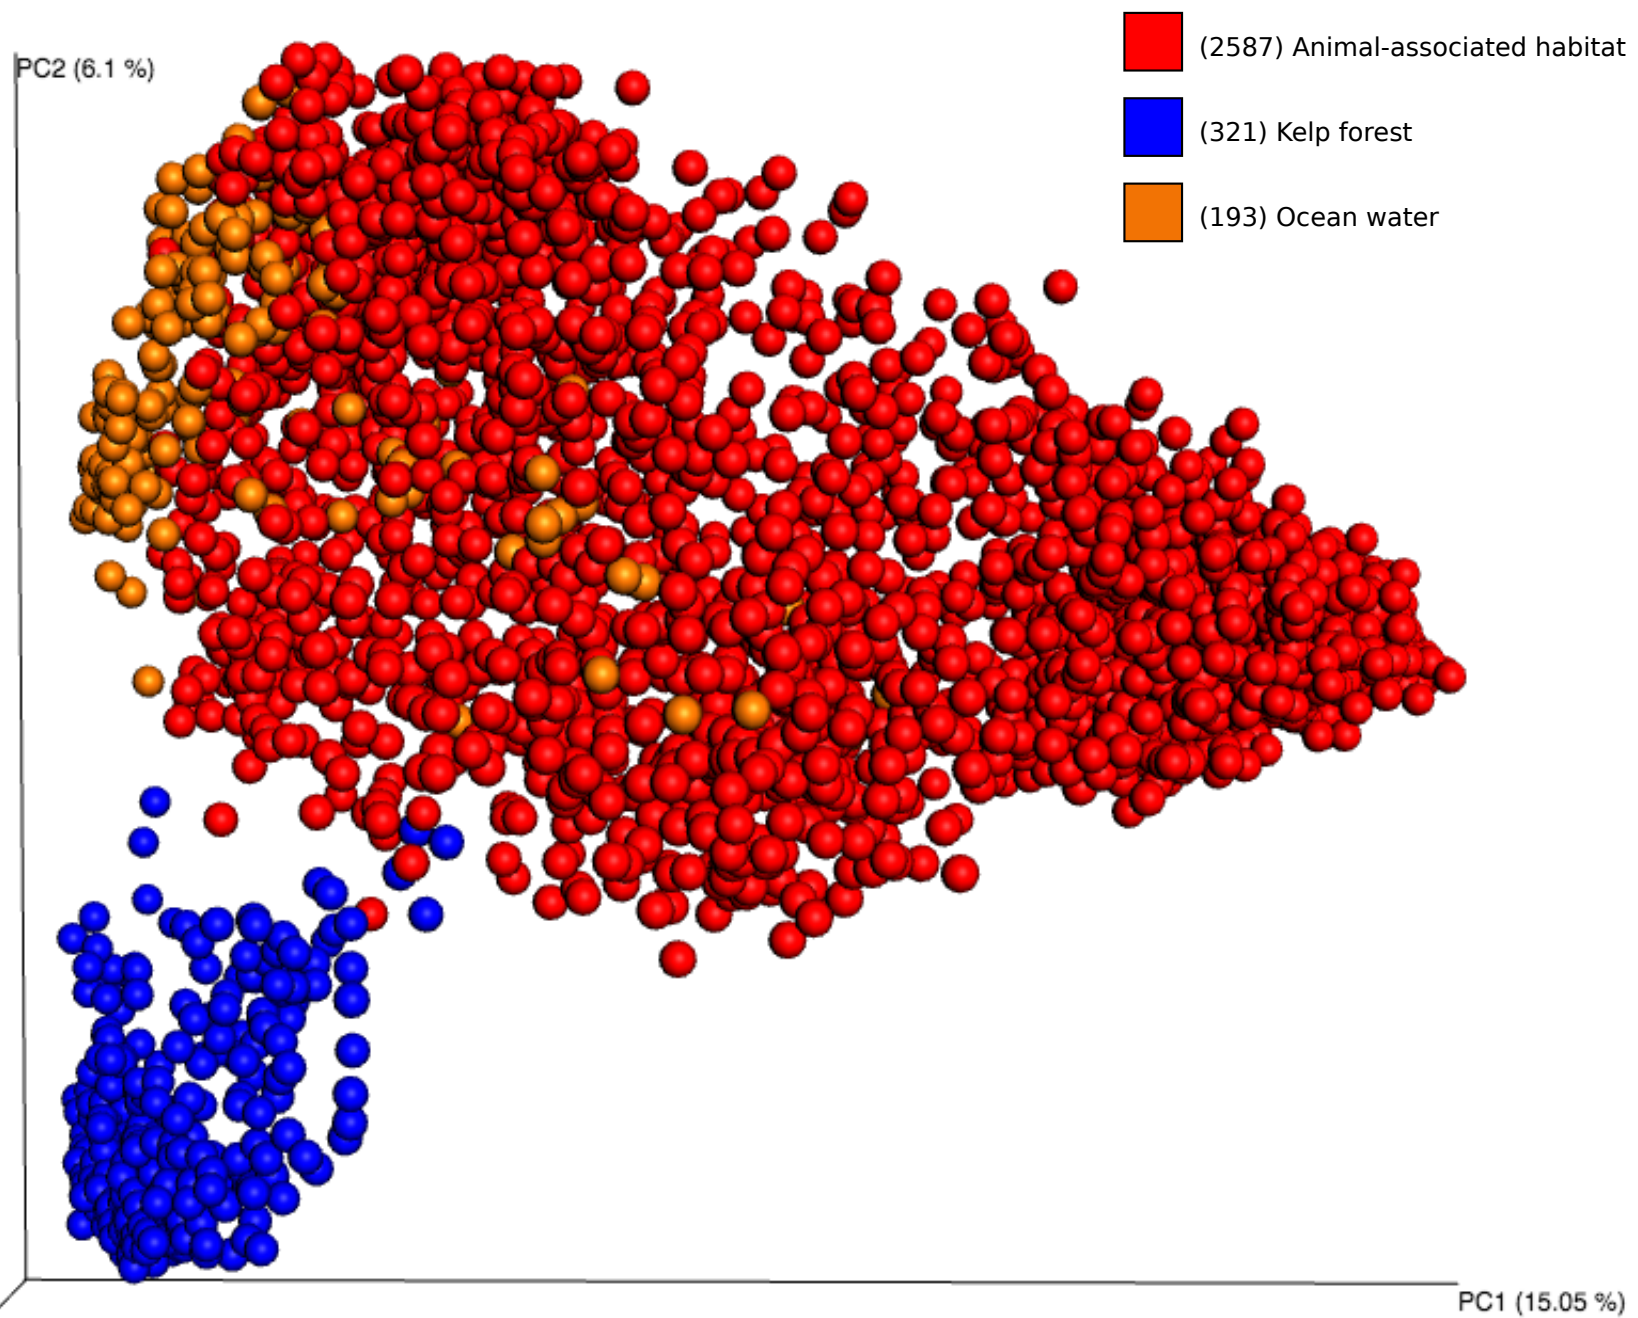

PC3 (4.23 %)

PC1 (15.05 %)

## taxonomy: k\_\_Bacteria;p\_\_Proteobacteria;c\_\_Alphaproteobacteria;o\_\_Rhizobiales

sequence: TACGAAGGGGGCTAGCGTTGTTCCGGAATCACTGGGCGTAAAGCGCACGTAGGCGGACTTTTAAGTCAGGGGTGAAATCCCGGGGCTCAACCCCGGAACTG

[More info from dbBact](#)

Present in 0.034474 of samples (132 / 3829)

### ▼ host\_scientific\_name (6 significant)

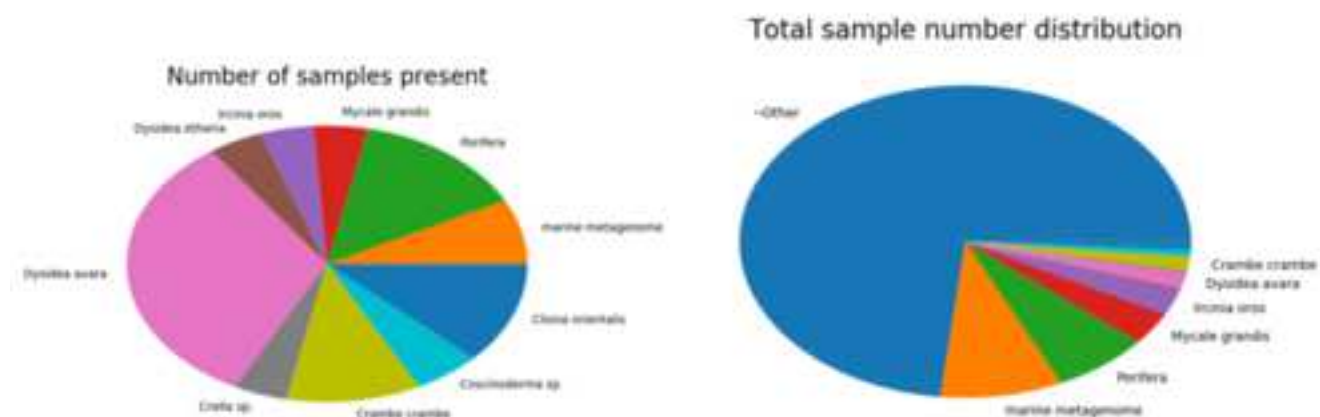

### Significant enrichment:

host\_scientific\_name:*Dysidea avara* (30/64) (p=0.000000)  
 host\_scientific\_name:*Crella sp.* (4/9) (p=0.000155)  
 host\_scientific\_name:*Dysidea etheria* (4/10) (p=0.000251)  
 host\_scientific\_name:*Cliona orientalis* (11/31) (p=0.000000)  
 host\_scientific\_name:*Coscinoderma sp.* (5/27) (p=0.002082)  
 host\_scientific\_name:*Crambe crambe* (10/56) (p=0.000020)

### ► env\_feature (1 significant)

► country (3 significant)

► ALL (84 significant)

[View as table](#)



Click here to access/download  
**Supplementary Material**  
Figure3.movie.gif





Click here to access/download  
**Supplementary Material**  
sample.metadata.tsv



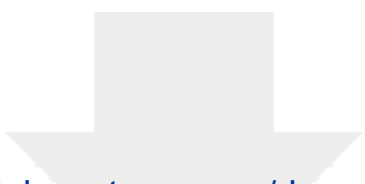

Click here to access/download  
**Supplementary Material**  
README.txt



Dear Dr. Nogoy,

We thank you for the assessment of the manuscript "The sponge microbiome project" (GIGA-D-17-00079). We have addressed the reviewers' comments as outlined below and hope you find the manuscript now suitable for publication.

Please do not hesitate to contact us with any further questions or comments.

Best wishes,

Torsten Thomas

*Reviewer reports:*

*Reviewer #1: General comments:*

*Moitinho-Silva et al presented a comprehensive microbiome dataset based on 16S rRNA gene sequencing of 269 sponge host species, along with samples from their habitats of seawater and sediments. With a global sampling coverage and consistent sample handling protocol from sponge tissue collection to DNA extraction, PCR condition and sequencing, this dataset provides a great platform to understand sponge microbiome in spatial and temporal scales. The systematic analysis done here will greatly benefit the sponge microbiome community, also serve as a valuable resource to compare with other host-associated microbiome systems.*

*In this manuscript, authors described details of the sequencing data analysis pipeline and compared the outcomes from commonly used clustering methods and different reference databases.*

*Accompanied metadata file is well organized and provides valuable information for further meta-analysis.*

*Although part of the dataset is associated with an analysis article published last year (Thomas, T. et al. 2016), current dataset include more samples and the authors provide additional value by creating the enrichment analysis tool on the website SpongeEMP.*

*Specific comments:*

*Line 108: "unique insight" or "insights"*

*Response:*

*Only "insights" was kept*

*Line 120: Were OTUs from negative control samples filtered out from downstream analysis?*

*Response:*

*Negative controls were kept in the final dataset to enable user to perform their own analysis of putative contaminating OTUs.*

*Line 127-133: Some detail information on QIIME pipeline is missing in this section (compare to the information provided in the mothur section below). I tried to find it in the supplementary file but maybe I missed it. How were the sequences quality filtered (like q score, length, etc)? How were the chimeric sequences detected here? What is the minimum reads to be considered as an OTU? There are both phylogenetic- and OTU-based unweighted distance measures, so it should be clarified which was used? If a phylogenetic unweighted distance was used, how the phylogenetic tree for UniFrac was built?*

*Response:*

*We have added the following text that clarifies how the QIIME pipeline works and what parameters were used:*

*"Raw sequences were demultiplexed and quality controlled following the recommendations of [16]. Quality-filtered, demultiplexed fastq files were processed using the default closed-reference pipeline from QIIME v. 1.9.1. Briefly, sequences were matched against GreenGenes reference database (v.*

13\_8 clustered at 97% similarity). Sequences that failed to align (e.g. chimeras) were discarded, which resulted in a final number of 300,140,110 sequences. Taxonomy assignments and the phylogenetic tree information were taken from the centroids of the reference sequence clusters contained in the GreenGenes reference database. This closed-reference analysis allows for cross-dataset comparisons and direct comparison with the tens of thousands of other samples processed in the EMP and available via the Qiita database [17].”

*In supplementary materials, authors provided OTU abundance matrix from the Mothur pipeline. For comparison, I feel authors can include in supplement the OTU table generated by QIIME OTU picking in biom format. Additionally, a phylogenetic tree file may be needed for future users to generate UniFrac PCoA plot like Figure 3. Together with the meta-data file, this can greatly facilitate subsequent analysis by sponge community to assess beta-diversity of the microbiome on specific environmental factors or host specificity. Line 161: Is the resulting biom file provided as part of the supplemental material here?*

Response:

We now provide the QIIME output in biom format and the tree file as supplementary information.

*Figure 2. Which cluster method is used here? Mothur or QIIME? The color scheme for Thaumarchaea is different in greengenes from the other two databases, need to be consistent. Do authors have some general comment regarding the pros and cons of using three reference databases?*

Response:

We now state that Figure 2 is based on the Mothur-based analysis.

The colour code is based on phylum-level assignments and the phylum Thaumarchaeota has been shown in the same colour for the RDP and Silva databases. The terminology “Thaumarchaeota” is used as a class in the Greengenes taxonomy, which belongs to the phylum “Crenarchaeota”. We therefore think it is appropriate to keep the colours different as they represent different taxonomic assignments.

We also now briefly comment on the use of different databases as follows “The inclusion of these taxonomies is helpful considering that they have substantial differences as recently discussed [25]. For example, Greengenes and RDP have the taxon Poribacteria, a prominent sponge-enriched phylum [26], which did not exist in the SILVA version used.”

*Figure 3. I suggest authors provide a 3D movie for the PCoA plot as a supplemental material for better visualization of the whole dataset. Alternatively, a 2D plot with 3 panels reflecting PC1 vs PC2, PC1 vs PC3 and PC2 vs PC3 also works.*

Response:

We now provide a movie of the PCoA plot now in the supplementary information.

*Figure 4. The legend states the pie chart is based on “relative abundance”, but in the figure it is “absolute abundance”. Please clarify it.*

Response:

There was a mix-up with the labels. We have fixed this to “Total samples present” as well as changed the label to the second pie chart to “Total sample number distribution”. We have also modified the figure legend to clarify the meaning of the two pie charts.

*My understanding is that authors only consider the presence or absence of a particular OTU in the enrichment analysis. If possible, I would like to see an additional function for enrichment analysis based on the relative abundance of a particular OTU, since relative abundance provides another angle to evaluate the importance of the bacterial OTU in the community. This probably needs to be done on a dataset with normalized sequencing depth (i.e., subsampled to 10,000 reads).*

Response:

We thank the referee for this useful suggestion. A non-parametric (Kruskal-Wallis) relative abundance test has been added to the webserver analysis. All category/value pairs significantly enriched in either of the two tests are now listed in the output, as well as the corresponding p-values. Figure 4 and the Database



metadata category enrichment section have been updated to include this additional analysis. All analysis is performed on a subsampled table (to 5000 reads/sample).

*Also, can author also show the p value on the website to reflect the degree of enrichment?*

Response:

We thank the referees for this useful suggestion. The two-sided binomial p-value for the absence/presence as well as the Kruskal-Wallis p-value for relative abundance have been added to the results page and the summary table.

*From a user's point of view, is there a way to export the analysis results (values from the piechart and number of samples with the OTU query) in text format from the website? It will be really helpful and convenient for the community to further evaluate the dataset.*

Response:

We thank the referees for this useful suggestion. We have added a link from the results page to an html table summarizing the enrichment results, which can be copied and pasted to excel for further processing.

*Reviewer #2: This is a robust dataset for an increasingly important microbiome. The authors present their dataset and describe their data in a clear and concise way. Some minor (except the last one) issues that need to be clarified are:*

*1. How was the sponge sampling designed? Was it a random sampling of sponge species found in a certain habitat?*

Response:

The sample contributors collected specimen often with specific questions or designs in mind, which will be subject of future publications using the presented dataset.

*2. What about the unidentified sponge species? Isn't the unidentified species dataset an impediment in the sponge microbiome comparisons?*

Response:

Unidentified species in the context of our study means that the species have not been given a formal taxonomic assignment. This taxonomic assignment is work in progress, which requires quite lengthy procedures, and the outcome of this will be added to the metadata in the future. We decided to still include those samples our study as they can help to address taxa-independent question, such as the occurrence of certain microbes in particular geographic regions.

*3. lines 132-133: "Sequences that failed to align were discarded". How many were those sequences id est what is the percentage of sequences used to produce the microbial taxonomic profile of marine sponge samples?*

Response:

We provide now the number of sequences (300,140,110) used for the final analysis.

*4. lines 209-211: "Raw sequence data were deposited in the European Nucleotide Archive (accession numbers: ERP020690). Quality-filtered, demultiplexed fastq files, Deblur and QIIME resulting OTU tables are available at Qiita database [16] (Study ID: 10793)". No results found for ERP020690 in ENA or Study ID: 10793 in Qiita? Why?*

Response:

The data have now been made public.
